# Supplementary material for: Proanthocyanidins Restore the Metabolic Diurnal Rhythm of Subcutaneous White Adipose Tissue According to Time-Of-Day Consumption
Source: MDPI journal article supplement (doi:10.3390/nu14112246), 2022-05-27
Supplement: s1 [file s1]

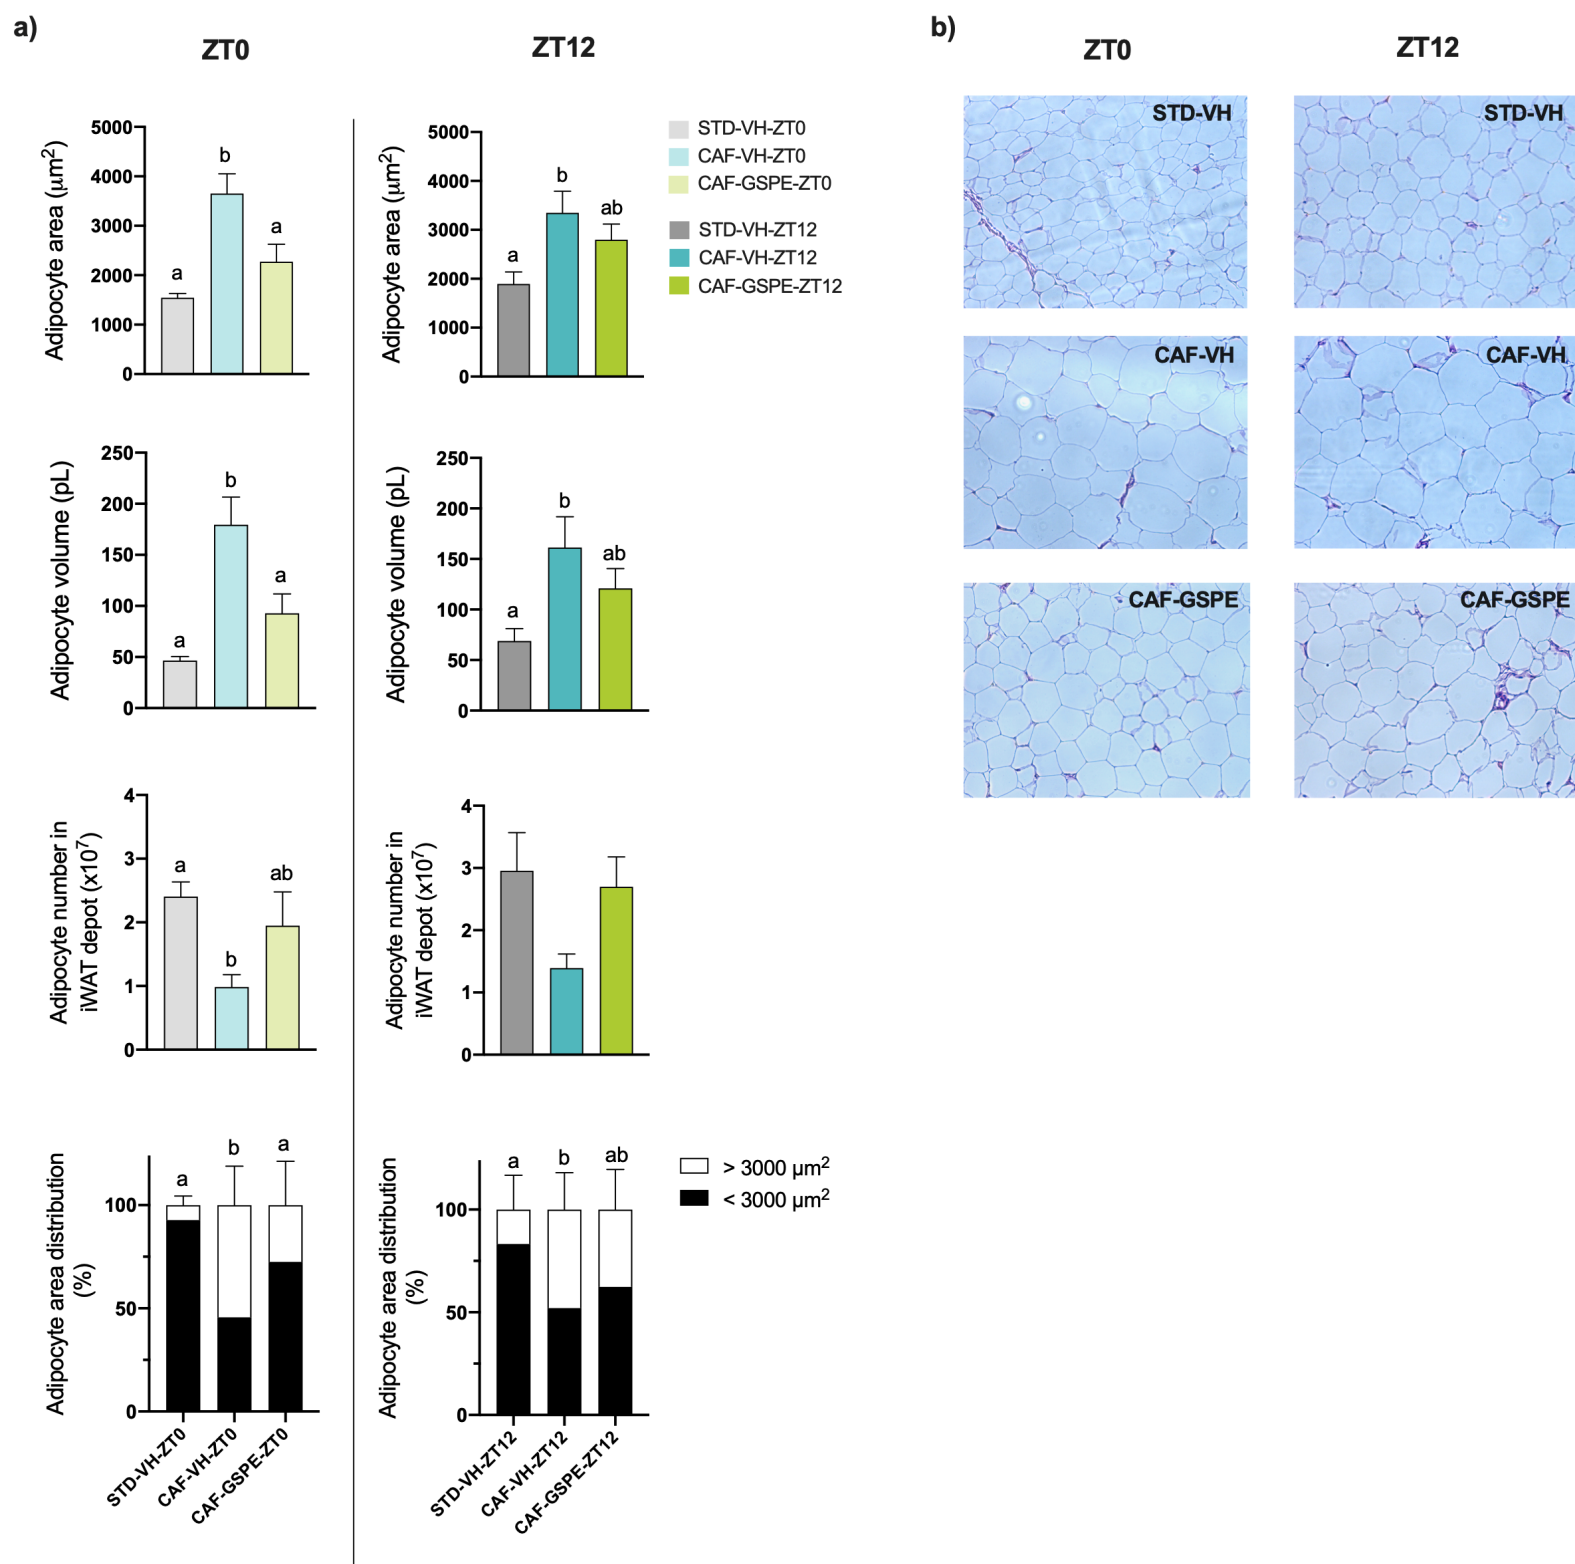

**Figure S1. iWAT histology.** Histology parameters (a) and representative images of hematoxylin & eosin staining (b). a, b; represent significant differences using one-way ANOVA ( $p < 0.05$ ) followed by Bonferroni posthoc test ( $n=6$ , rats sacrificed at ZT1 and ZT7).

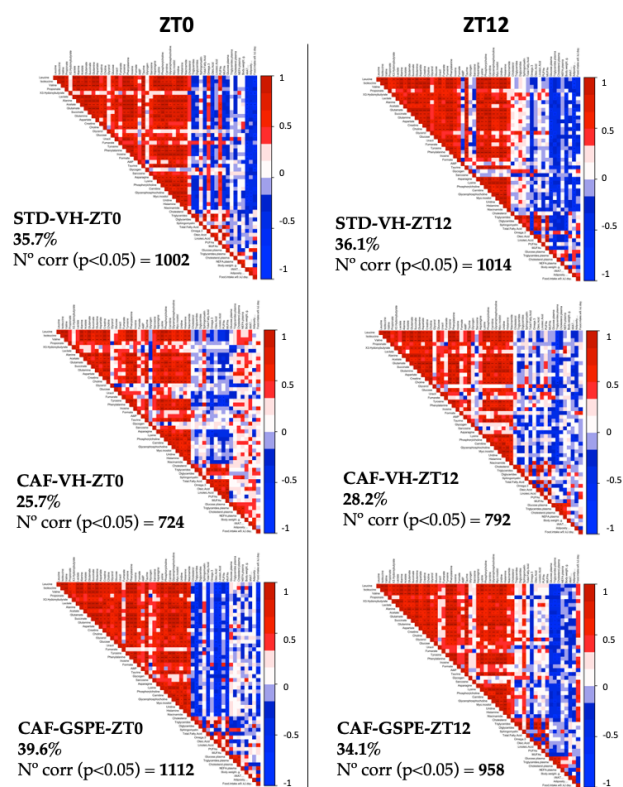

**Figure S2.** Correlation analysis among iWAT metabolites, final body weight, iWAT relative weight, adiposity and food intake at week 9. \* significant correlation analysis using Spearman method ( $p < 0.05$ ). Red and blue mean positive and negative correlations, respectively.
